# Supplementary material for: Punicalagin, an active component in pomegranate, ameliorates cardiac mitochondrial impairment in obese rats via AMPK activation
Source: PubMed Central journal article supplement (PMC4642696; doi:10.1038/srep14014), 2015-09-15
Supplement: srep14014-s1.pdf [file srep14014-s1.pdf]

## Supplementary materials

### **Punicalagin, an active component in pomegranate, ameliorates cardiac mitochondrial impairment in obese rats via AMPK activation**

Ke Cao<sup>1</sup>, Jie Xu<sup>2</sup>, Wenjun Pu<sup>2</sup>, Zhizhong Dong<sup>3</sup>, Lei Sun<sup>4</sup>, Weijin Zang<sup>4</sup>, Feng Gao<sup>5</sup>, Yong Zhang<sup>2,6</sup>, Zhihui Feng<sup>1\*</sup>, Jiankang Liu<sup>2\*</sup>

<sup>1</sup>Center for Mitochondrial Biology and Medicine, Frontier Institute of Science and Technology, Xi'an Jiaotong University, Xi'an, 710049, China; <sup>2</sup>The Key Laboratory of Biomedical Information Engineering of Ministry of Education, School of Life Science and Technology, Xi'an Jiaotong University, Xi'an, 710049, China; <sup>3</sup>Nestlé Research Center Beijing, Beijing, 100095, China; <sup>4</sup>Department of Pharmacology, School of Medicine, Xi'an Jiaotong University, Xi'an, 710049, China. <sup>5</sup>Department of Physiology, Fourth Military Medical University, Xi'an, 710032, China; <sup>6</sup>Tianjin Key Laboratory of Exercise Physiology and Sports Medicine, Tianjin University of Sport, Tianjin, 300381, China.

**Word count:** 4,995; **References:** 51

**Greyscale illustrations:** 8; **Color illustrations:** 0

**Running title:** AMPK activation by punicalagin in hearts of obese rats

#### **\*Corresponding authors:**

Zhihui Feng, PhD and Jiankang Liu, PhD

Center for Mitochondrial Biology & Medicine

Xi'an Jiaotong University

28 W. Xian-ning Road

Xi'an 710049, China

Tel: 86-29-82664232

E-Mail: [zhfeng@mail.xjtu.edu.cn](mailto:zhfeng@mail.xjtu.edu.cn) and [j.liu@mail.xjtu.edu.cn](mailto:j.liu@mail.xjtu.edu.cn)

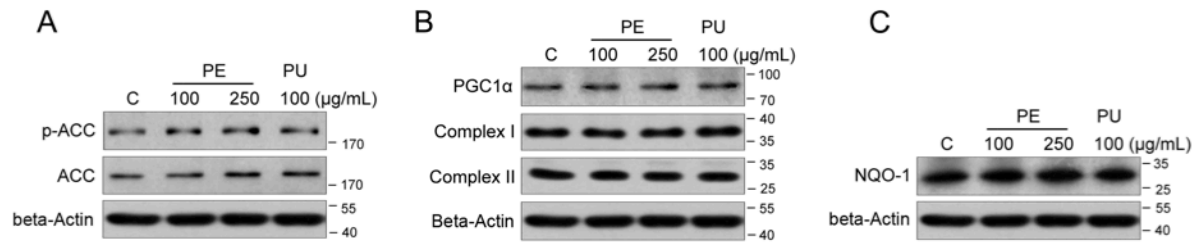

**Supplementary Figure 1. Effects of PU and PE on AMPK pathway in neonatal cardiac fibroblasts.** (A) Neonatal cardiac fibroblasts were treated with PE at 100, 250  $\mu\text{g/mL}$  and PU at 100  $\mu\text{g/mL}$  for 2 h, p-ACC and ACC was analyzed by western blot. Neonatal cardiac fibroblasts were treated with PE at 100, 250  $\mu\text{g/mL}$  and PU at 100  $\mu\text{g/mL}$  for 24 h, mitochondrial biogenesis related PGC-1 $\alpha$ , complex I, II (B), and phase II enzyme NQO-1 (C) was analyzed by western blot.

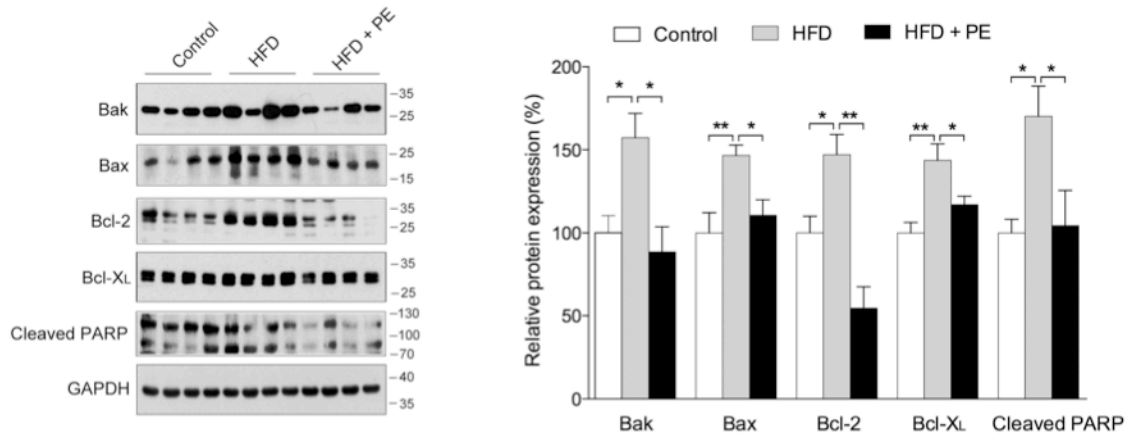

**Supplementary Figure 2. PE and HFD on cardiac apoptosis pathway.** SD rats in the HFD groups were administered either saline or PE (150 mg/kg/day) for 8 weeks. Protein samples were prepared from heart tissue. Proteins in apoptosis pathway were analyzed by western blot (A: blot image; B: arbitrary unit analysis). The values are presented as the means  $\pm$  S.E.M. ( $n \geq 8$ ); \* $p < 0.05$ , \*\* $p < 0.01$ .

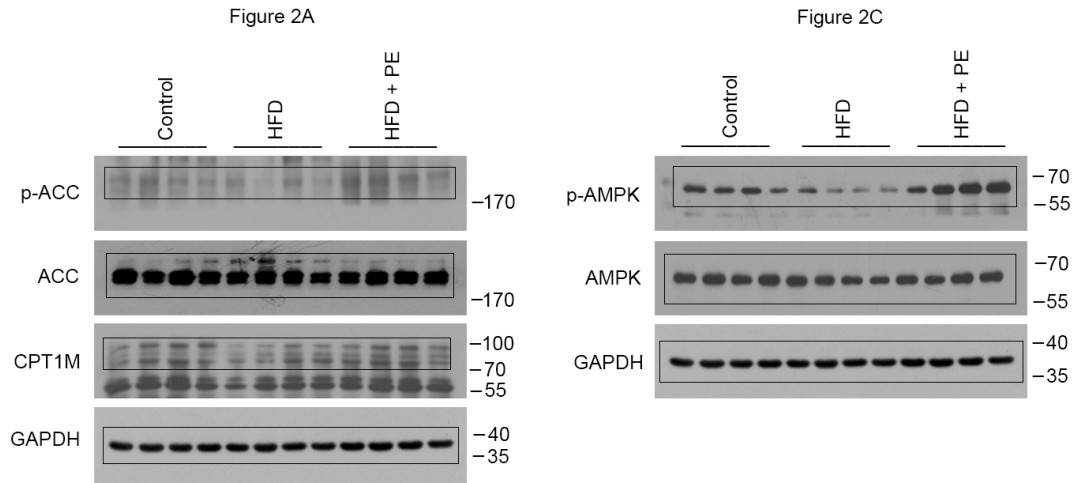

**Supplementary Figure 3. Uncropped Western blots to the corresponding figures.**  
Molecular weight makers are indicated in KDa.

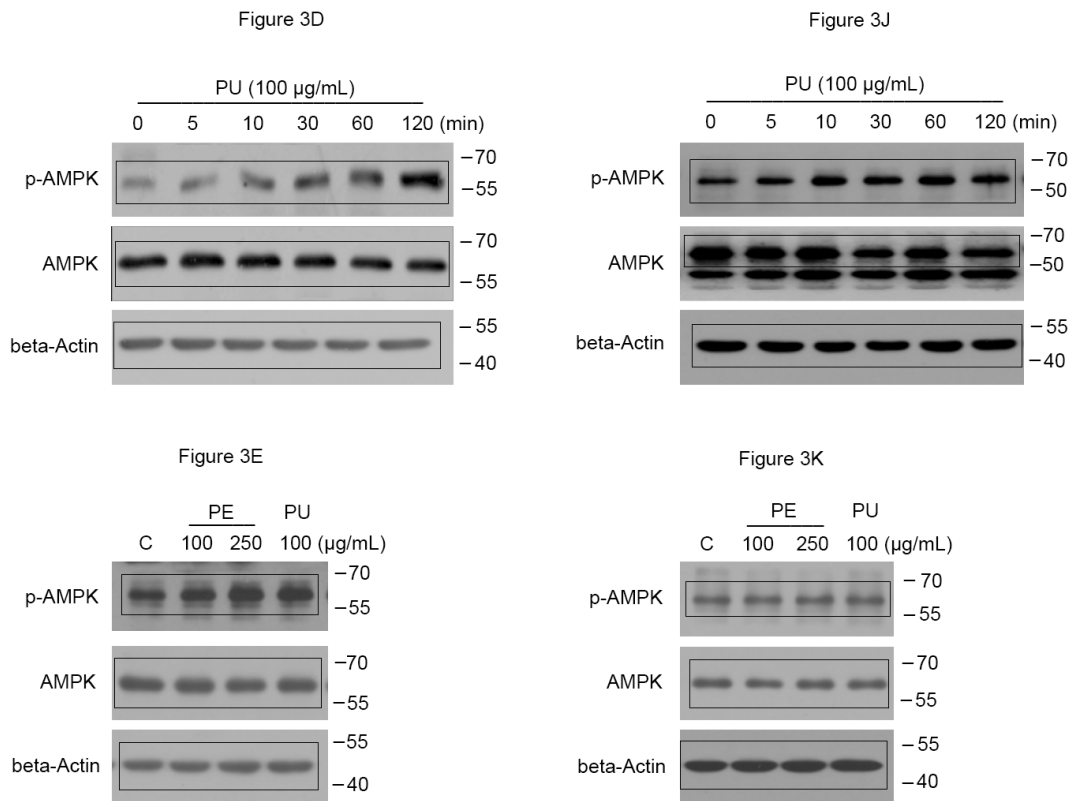

**Supplementary Figure 4. Uncropped Western blots to the corresponding figures.**  
Molecular weight makers are indicated in KDa.

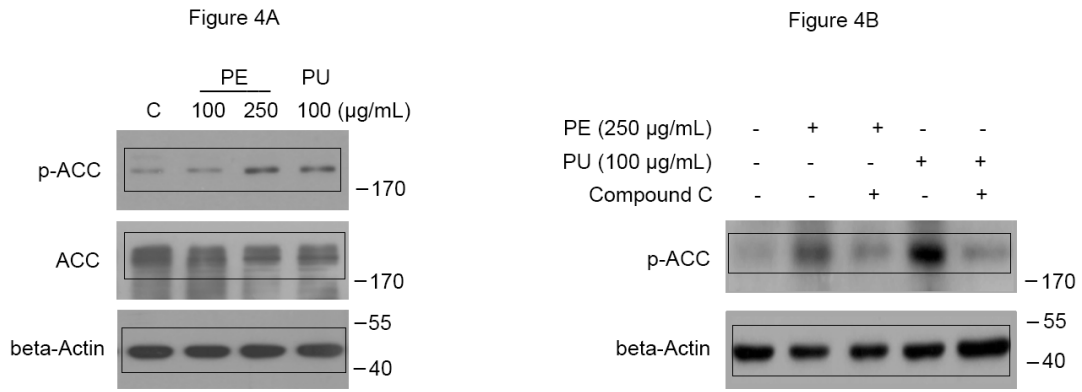

**Supplementary Figure 5. Uncropped Western blots to the corresponding figures.**  
Molecular weight makers are indicated in KDa.

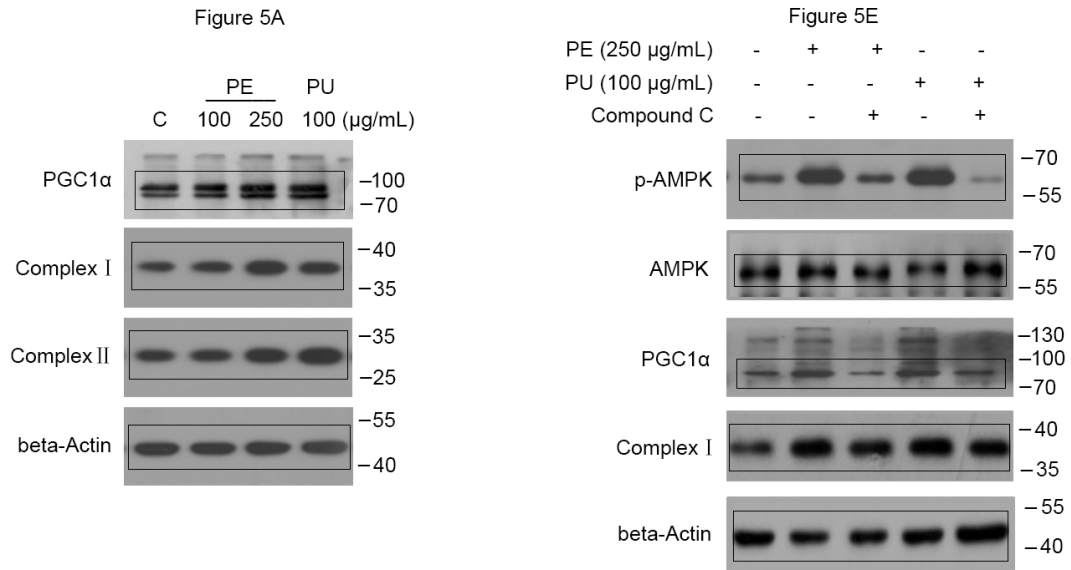

**Supplementary Figure 6. Uncropped Western blots to the corresponding figures.**  
Molecular weight makers are indicated in KDa.

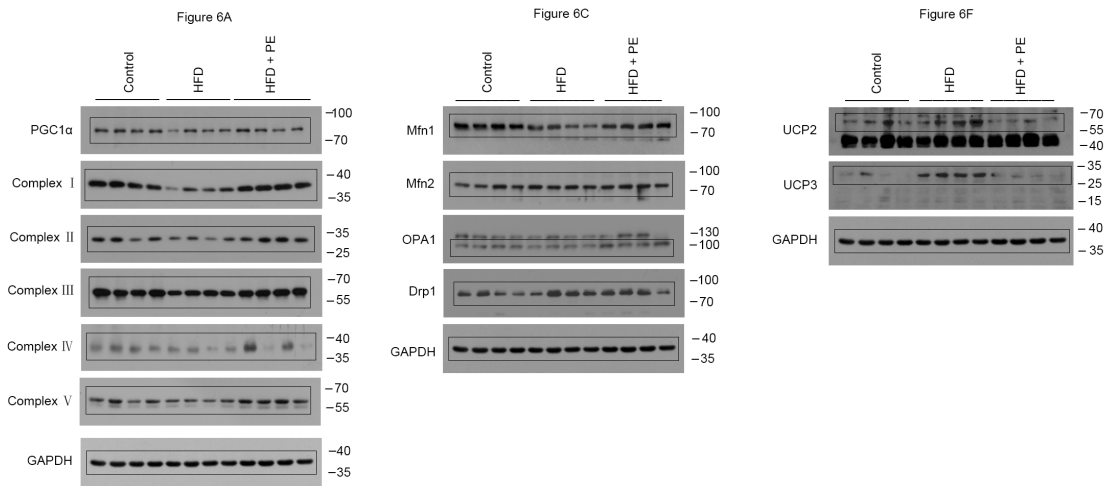

**Supplementary Figure 7. Uncropped Western blots to the corresponding figures.** Molecular weight makers are indicated in KDa.

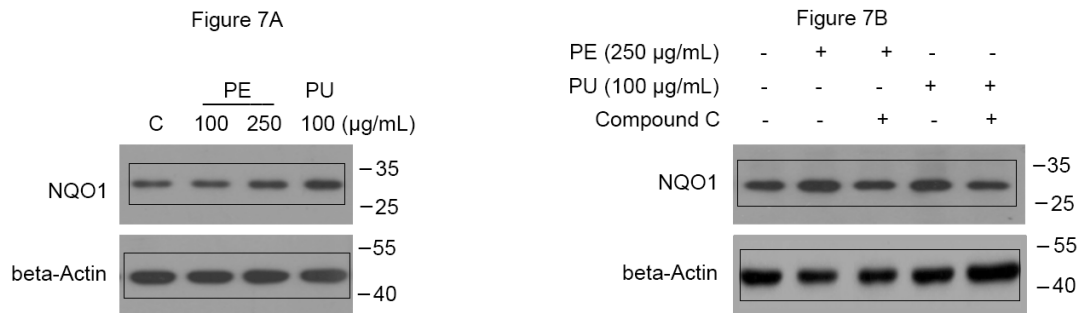

**Supplementary Figure 8. Uncropped Western blots to the corresponding figures.** Molecular weight makers are indicated in KDa.

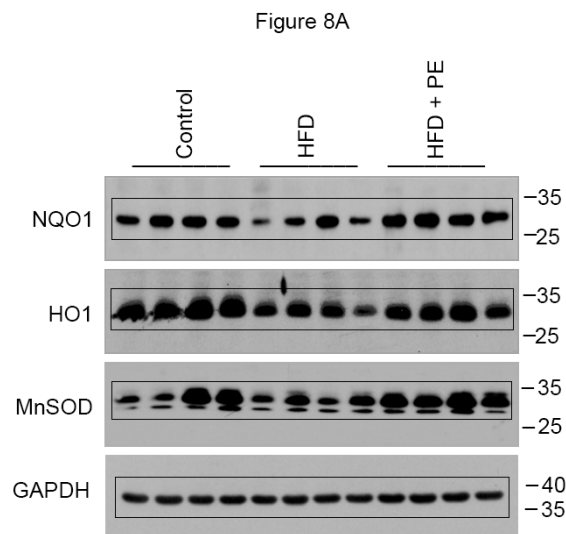

**Supplementary Figure 9. Uncropped Western blots to the corresponding figures.**  
Molecular weight makers are indicated in KDa.
